# Supplementary material for: Genome-Wide Discovery of Genes Required for Capsule Production by Uropathogenic Escherichia coli
Source: PubMed Central journal article supplement (PMC5654933; doi:10.1128/mbio.01558-17), 2017-10-24

A

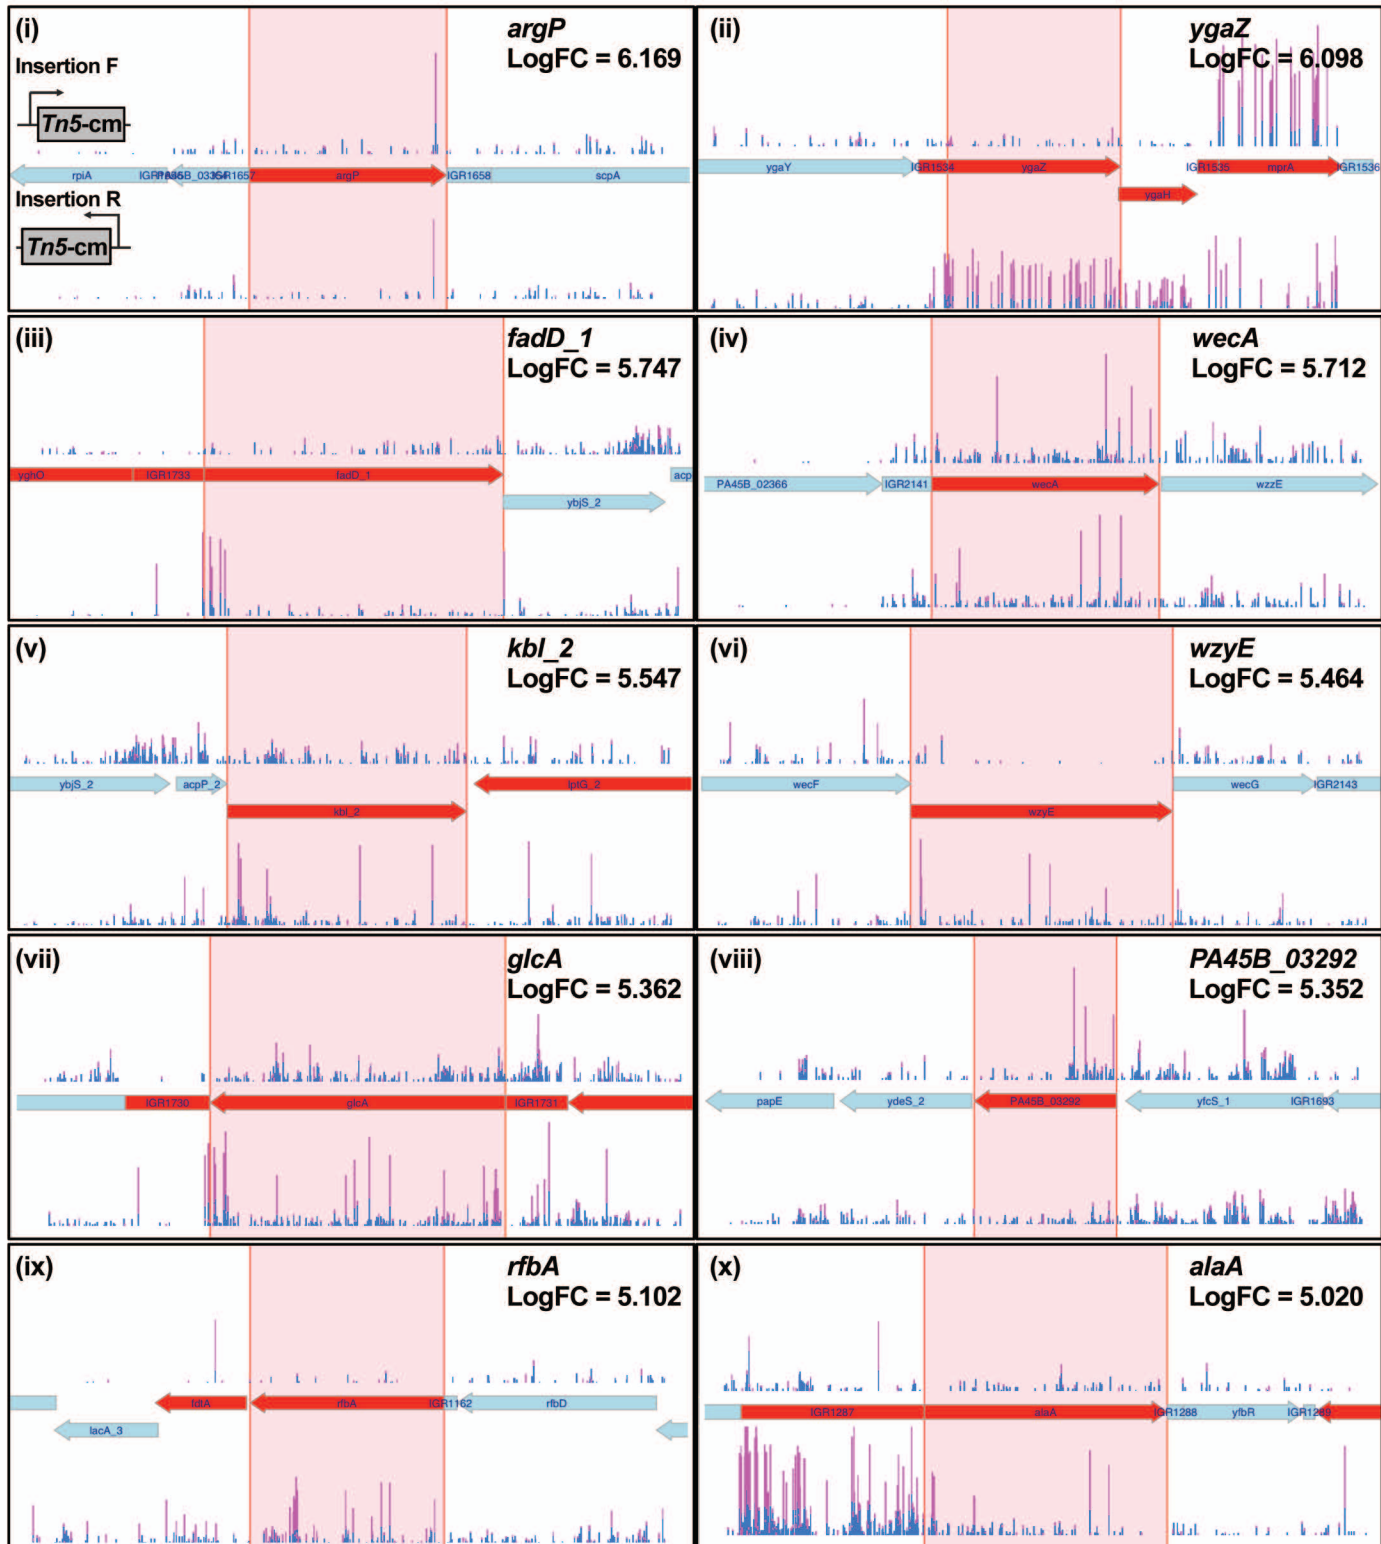

**B**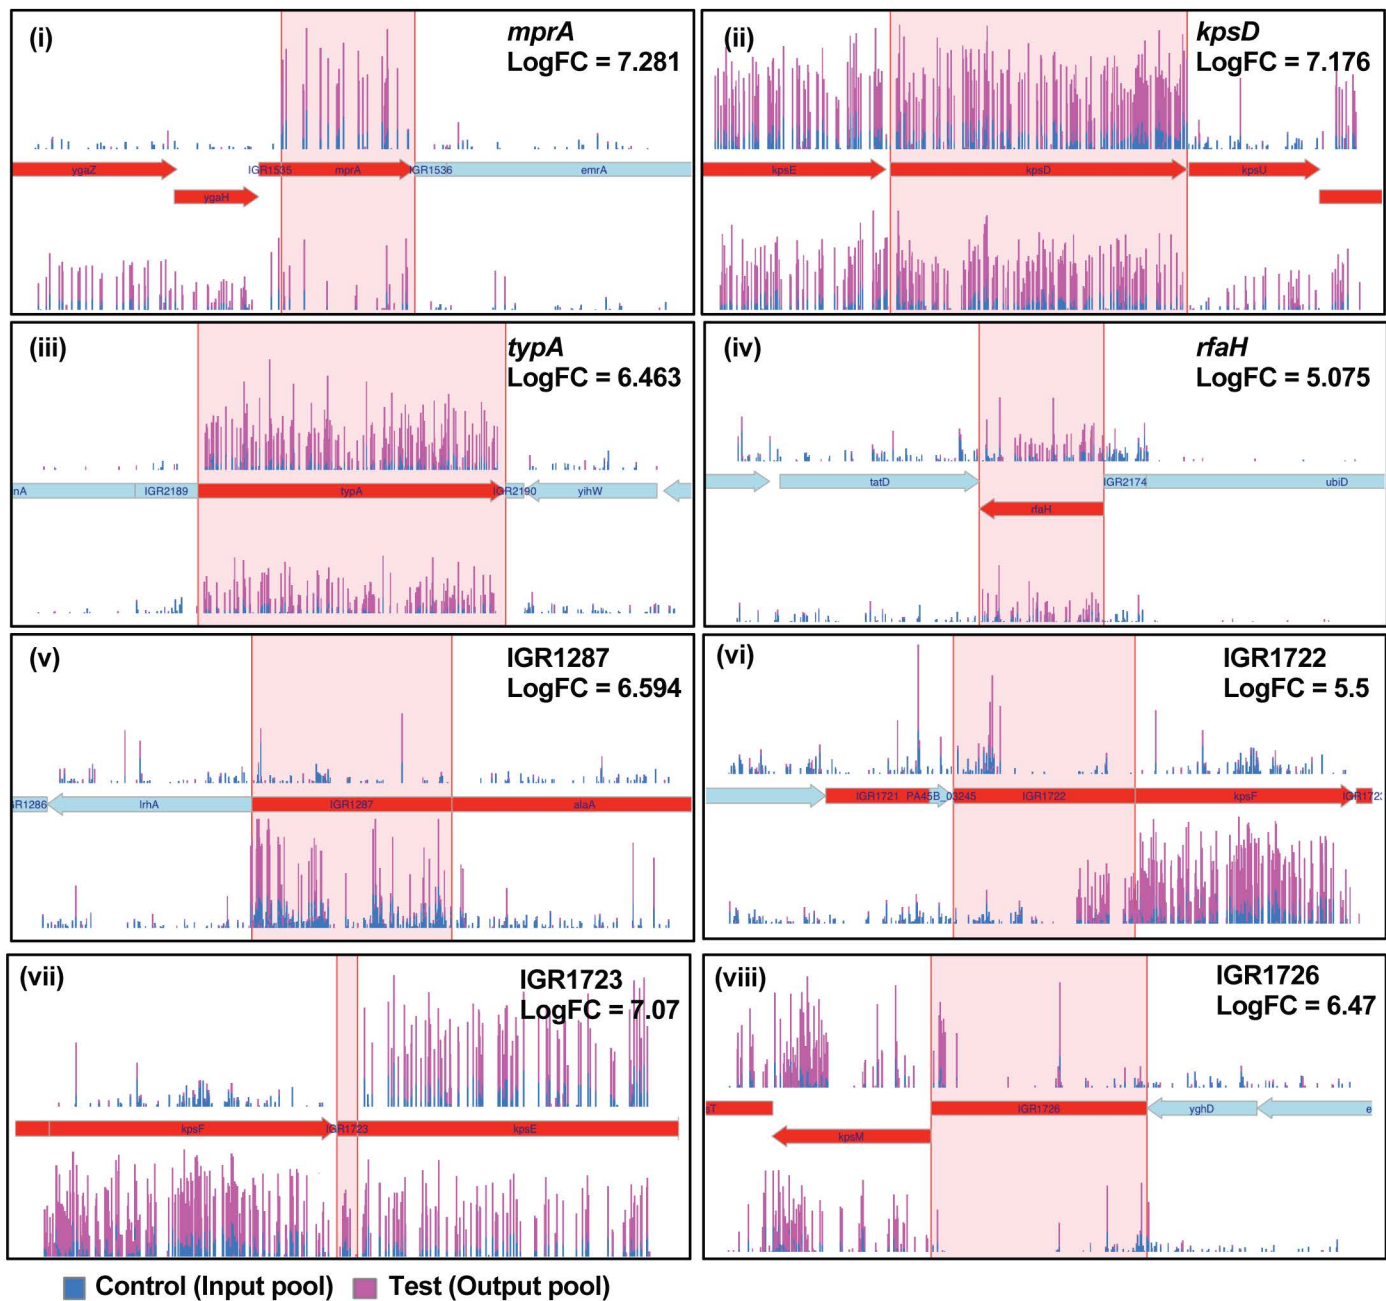

Supplement: mbo005173539sf3.pdf [file mbo005173539sf3.pdf]
